# Supplementary material for: 3D Tumor Models in Urology
Source: MDPI journal article supplement (doi:10.3390/ijms24076232), 2023-03-25
Supplement: s1 [file s1]

**Table S1. Antibodies used for immunofluorescence.**

| Target                                                         | Host | Type             | Source | Catalog-No. |
|----------------------------------------------------------------|------|------------------|--------|-------------|
| <b>Primary antibodies</b>                                      |      |                  |        |             |
| Actin-beta (ACTB)                                              | Ms   | IgG1, monoclonal | [1]    | A2228       |
| Ki-67                                                          | Rb   | IgG, polyclonal  | [2]    | ab15580     |
| Cytokeratin 5&6 (CK5+6)                                        | Ms   | IgG1, monoclonal | [2]    | ab17133     |
| Cytokeratin Pan-Alexa Fluor 488 (CKPAN)                        | Ms   | IgG1, monoclonal | [3]    | ABIN909639  |
| Ki-67                                                          | Ms   | IgG1, monoclonal | [4]    | MSK018-05   |
| Zonula occludens protein (ZO-1)                                | Ms   | IgG1, monoclonal | [5]    | 610966      |
| Vinculin (VCL)                                                 | Ms   | IgG, monoclonal  | [1]    | V9131       |
| Von Willebrand factor (VWF)                                    | Rb   | IgG              | [6]    | A 0082      |
| <b>Secondary antibodies</b>                                    |      |                  |        |             |
| anti-Mouse IgG (H+L) Alexa Fluor 488                           | Gt   | IgG              | [7]    | A32727      |
| anti-Rabbit IgG (H+L) Alexa Fluor 555                          | Gt   | IgG              | [7]    | A32732      |
| F(ab') <sub>2</sub> Fragment of Goat Anti Mouse IgG (H+L)      | Gt   | IgG              | [8]    | A11017      |
| 594 F(ab') <sub>2</sub> Fragment of Goat Anti Rabbit IgG (H+L) | Gt   | IgG              | [8]    | A11072      |

Rb = rabbit, Gt = goat, Ms = mouse

[1] Sigma-Aldrich, St.-Louis, MI, USA

[2] Abcam, Cambridge, MA, USA

[3] antibodies-online, Aachen, Germany

[4] Zytomed-Systems, Oxfordshire, UK

[5] BD biosciences, Heidelberg, Germany

[6] Agilent (DAKO), Santa Clara, CA, USA

[7] ThermoFisher Scientific (Invitrogen), Rockford, IL, USA

[8] Life Technologies/Invitrogen Carlsbad, CA, USA
